# Supplementary material for: A new Phenol Red-modified porphyrin as efficient protein photocleaving agent
Source: Royal Society of Chemistry journal article supplement (doi:10.1039/c0cp00012d), 2010-01-01
Supplement: c0cp00012d.pdf [file c0cp00012d.pdf]

Electronic Supplementary Information

# A New Phenol Red-Modified Porphyrin as Efficient Protein Photocleaving Agent

Guo-Yu Jiang, <sup>a,b</sup> Wan-Hua Lei, <sup>a</sup> Qian-Xiong Zhou, <sup>a,b</sup> Yuan-Jun Hou, <sup>a</sup>

Xue-Song Wang, <sup>\*a</sup> and Bao-Wen Zhang <sup>\*a</sup>

<sup>a</sup> *Key Laboratory of Photochemical Conversion and Optoelectronic Materials, Technical  
Institute of Physics and Chemistry, Chinese Academy of Sciences, Beijing 100190, P. R. China.*

*E-mail: [xswang@mail.ipc.ac.cn](mailto:xswang@mail.ipc.ac.cn), [g203@mail.ipc.ac.cn](mailto:g203@mail.ipc.ac.cn)*

<sup>b</sup> *Graduate School of Chinese Academy of Sciences, Beijing 100049*

1. <sup>1</sup>H NMR spectra

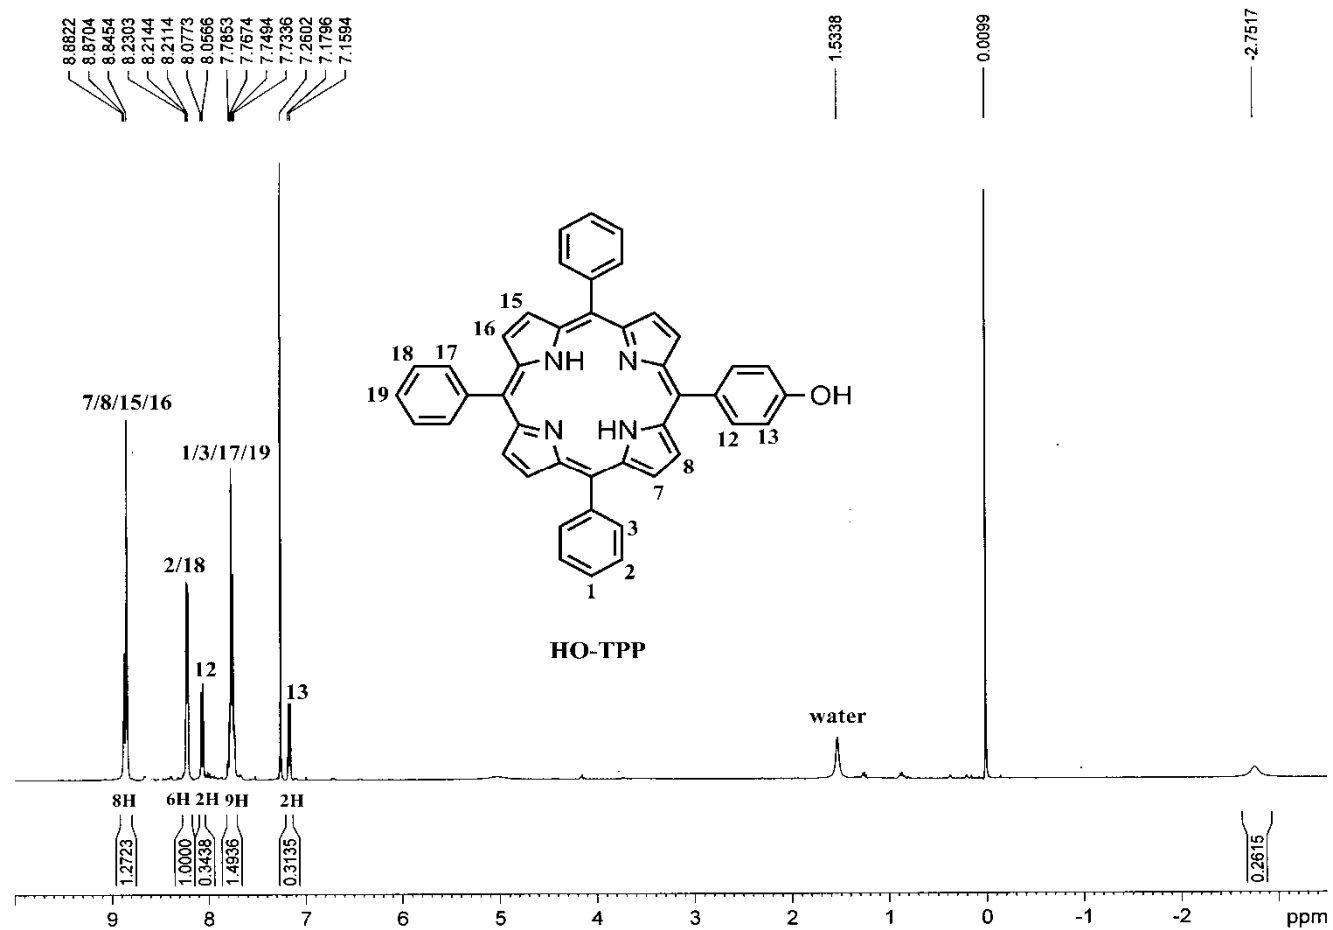

Figure S1. <sup>1</sup>H NMR spectrum of 5-(4'-Hydroxyphenyl)-10,15,20-triphenylporphyrin (HO-TPP) conducted with a 400MHz NMR spectrometer.

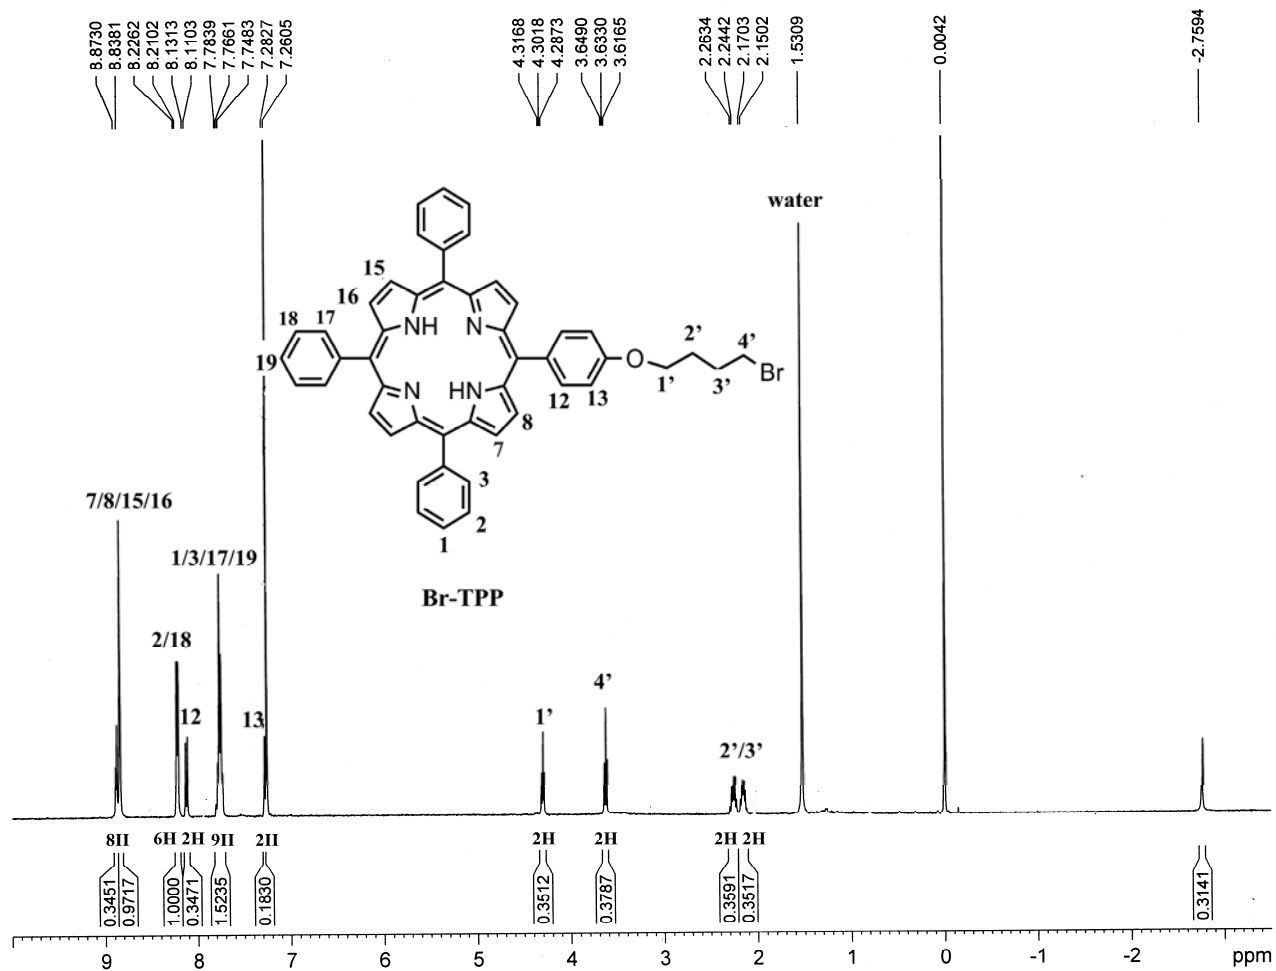

Figure S2. <sup>1</sup>H NMR spectrum of 5-(4'-Bromobutoxyphenyl)-10,15,20-triphenylporphyrin (**Br-TPP**) conducted with a 400MHz NMR spectrometer.

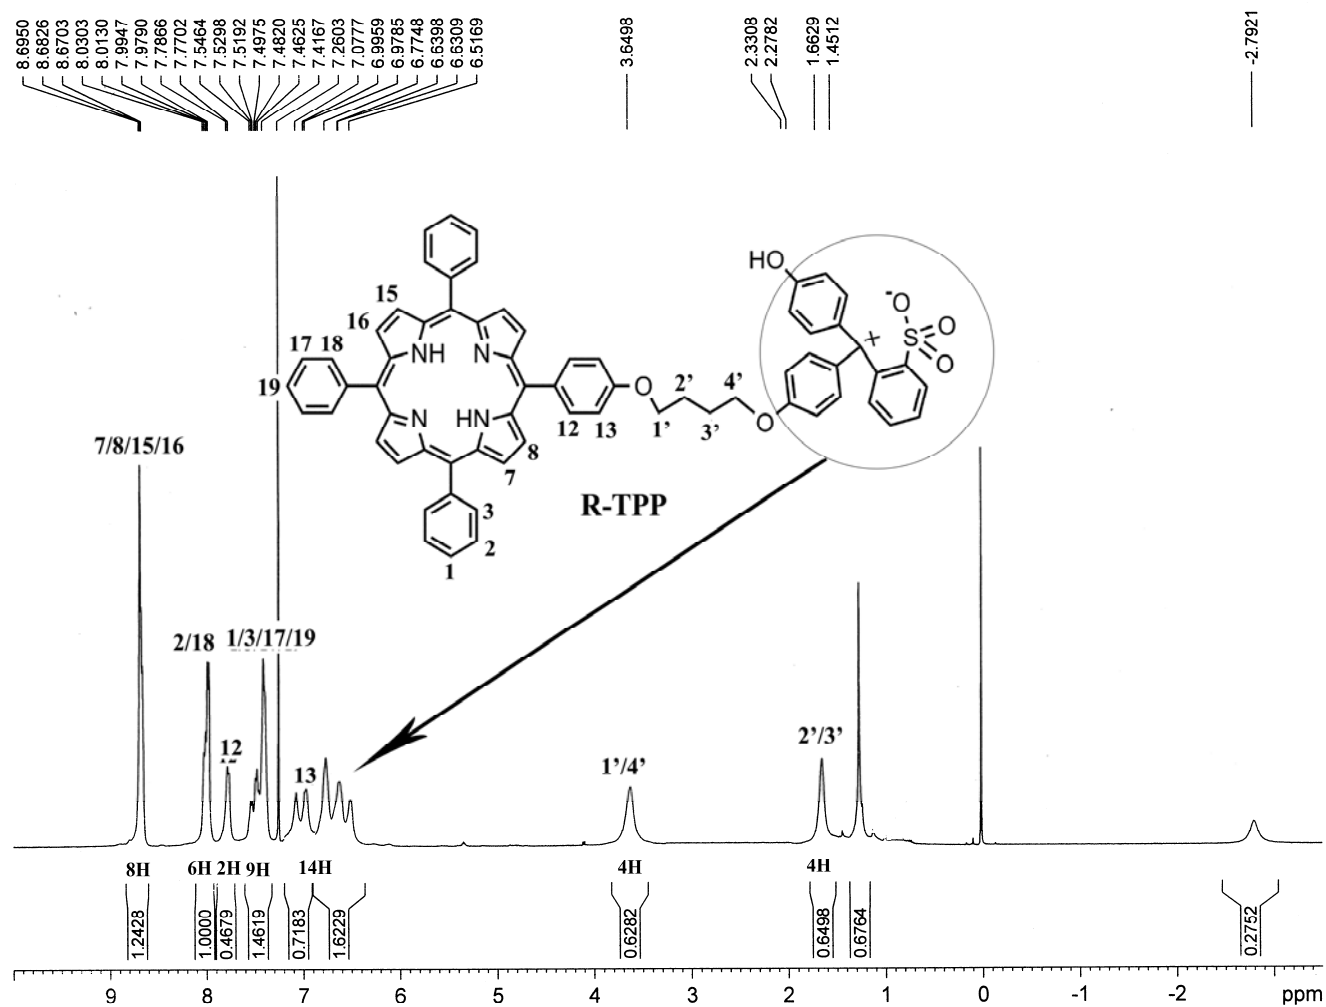

Figure S3. <sup>1</sup>H NMR spectrum of the synthesized phenol red modified porphyrin (R-TPP) conducted with a 400MHz NMR spectrometer.

2.  $^{13}\text{C}$  NMR spectra.

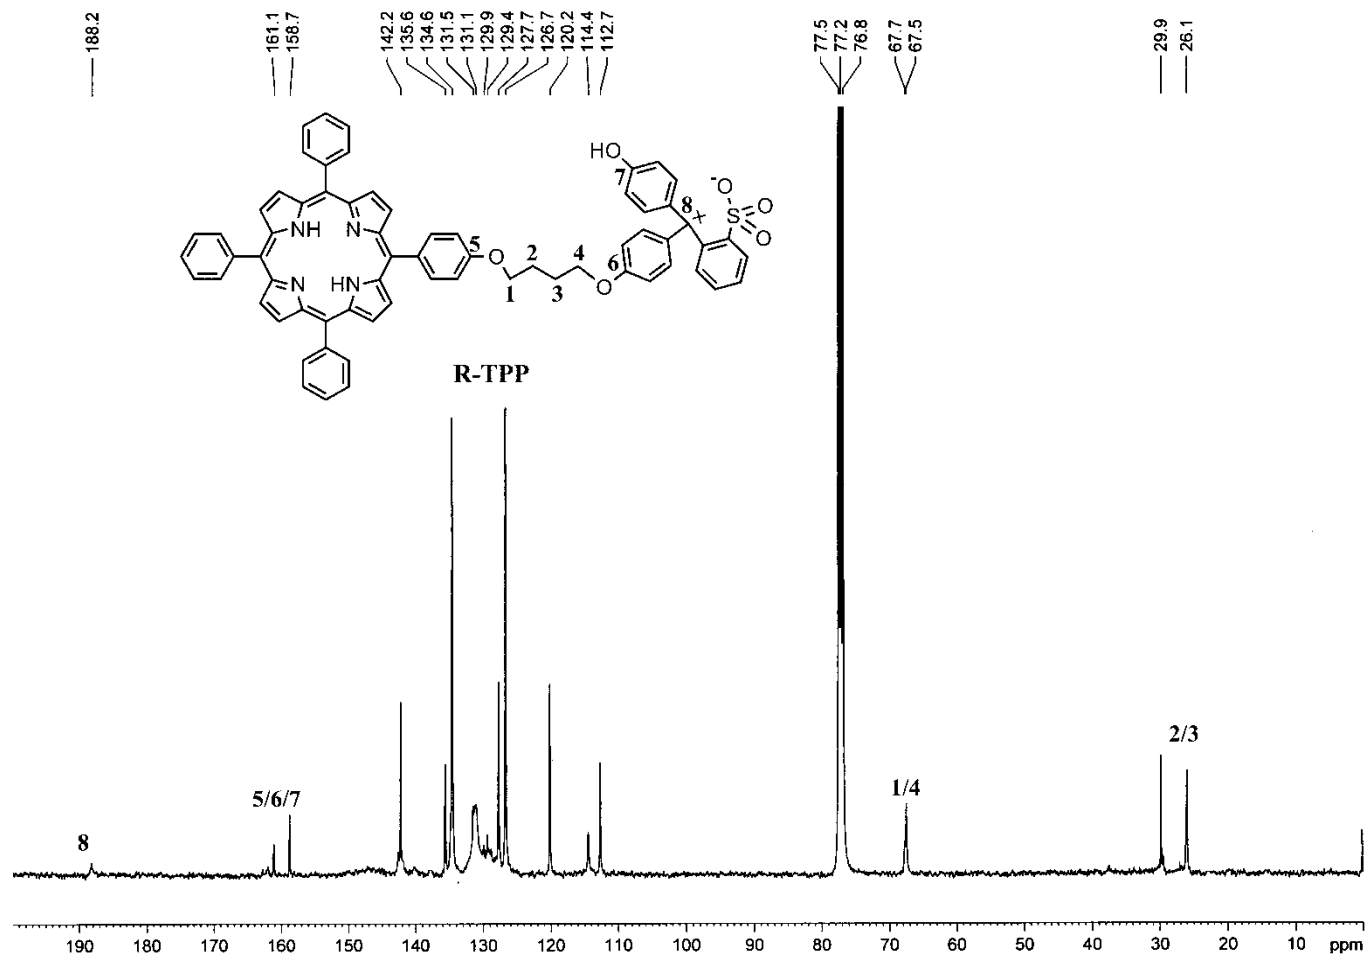

Figure S4.  $^{13}\text{C}$  NMR spectrum of the synthesized phenol red modified porphyrin (R-TPP) conducted with a 400MHz NMR spectrometer.

### 3. HRMR spectra.

#### Bruker APEX IV FT\_MS (7.0 T) Report (all)

**Analysis Info** 北京大学医药卫生分析中心 Acquisition Da 01/03/2010 10:57:23  
 Analysis Nam C:\data\_sample\ESI\_2010301\_10\ESI\_R\_2010301\BLANK\_1  
 Method Operator bpfxsh@bjmu.edu.cn; Tel: 010\_82801437  
 Sample Name Instrument FT\_MS\_Bruker APEX IV (7.0 T)  
 Comment ESI C67H50N4O6S1 MW 1038.3451  
 CAL588; 226.16718;249.15695;340.25887;301.14158;  
 362.24081;391.28483;413.26647;453.34353;  
 475.32548;509.25407;509.25407;566.42760;  
 588.40954;679.51166;701.49361;826.47121;  
 in 1:1 Tol:MeOH; CapExit 150V, m/z 150-1500; 1024K; D1 2s  
 0.05 mg/mL; 150uL/h

| Acquisition Result: | Exact Mass | Measured Mass | Error (mm/e) | Error (ppm) | Description |
|---------------------|------------|---------------|--------------|-------------|-------------|
|                     | 1039.35238 | 1039.3486     | 3.78         | 3.64        | M+H;-e      |

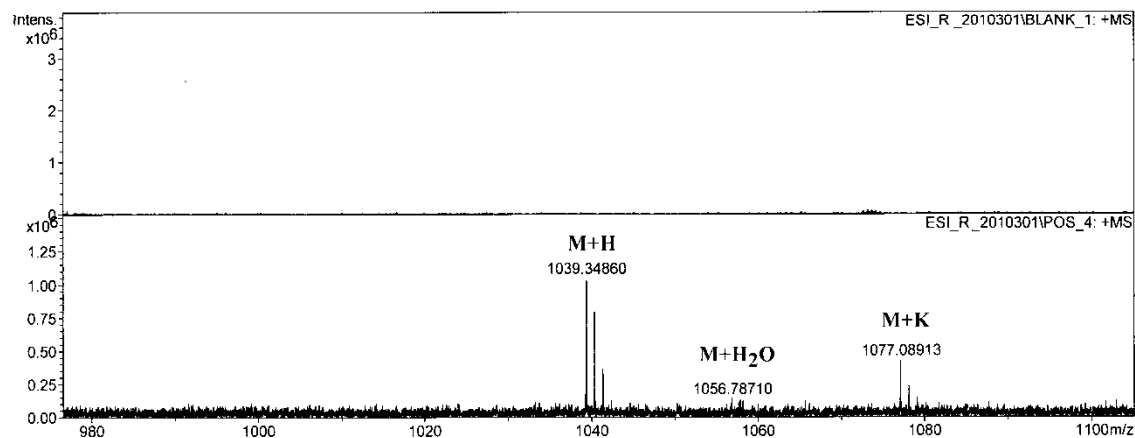

Bruker Daltonics DataAnalysis 3.4

printed: 01/03/2010 11:10:59

Page 1 of 1

**Figure S5.** HRMS spectrum of the synthesized phenol red modified porphyrin (R-TPP).
